# Supplementary material for: N6-methyladenosine modification governs liver glycogenesis by stabilizing the glycogen synthase 2 mRNA
Source: PubMed Central journal article supplement (PMC9671881; doi:10.1038/s41467-022-34808-2), 2022-11-17
Supplement: 41467_2022_34808_MOESM1_ESM.pdf [file 41467_2022_34808_MOESM1_ESM.pdf]

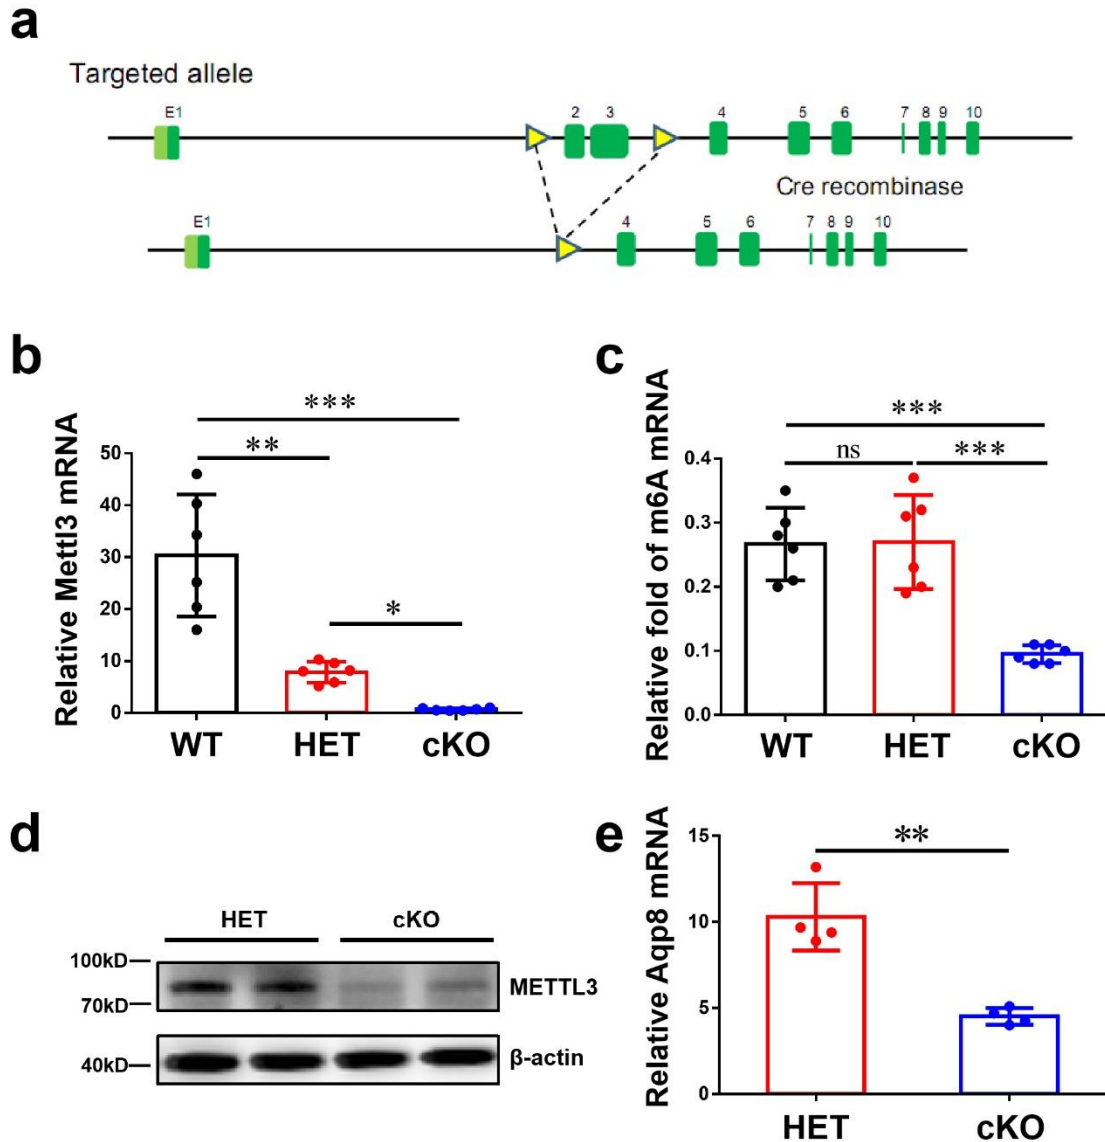

**supplementary Figure 1. Generation of hepatocyte-specific *Mettl3* knockout mice.** (a) Schematic diagram of strategy to construct flox mouse. (b) qRT-PCR assay of *Mettl3* mRNA level ( $\beta$ -actin as reference) in wildtype (WT), heterozygous (HET) and conditional Knockout (cKO).  $n=6$  animals. Data are presented as mean values  $\pm$  SEM. One-way ANOVA was performed to determine a difference between each column. \*,  $p < 0.05$ ; \*\*,  $p < 0.01$ ; \*\*\*,  $p < 0.001$ . (c) The levels of m6A mRNA were analyzed in livers of different genotypes.  $n=6$  animals. Data are presented as mean values  $\pm$  SEM. One-way ANOVA was performed to determine a difference between each column. ns, not significant; \*\*\*,  $p < 0.001$ . (d) Western blotting assay of *Mettl3* protein level in HET and cKO mouse livers. This experiment was repeated independently with similar results at least 3 times. (e) qRT-PCR assay of *Aqp8* mRNA level ( $\beta$ -actin as reference) in HET and cKO mouse livers.  $n=4$  animals. Data are presented as mean values  $\pm$  SEM. Two-sided Student's t test was performed to determine a difference among groups, \*\*,  $p = 0.001$ . Source data are provided as a Source Data file.

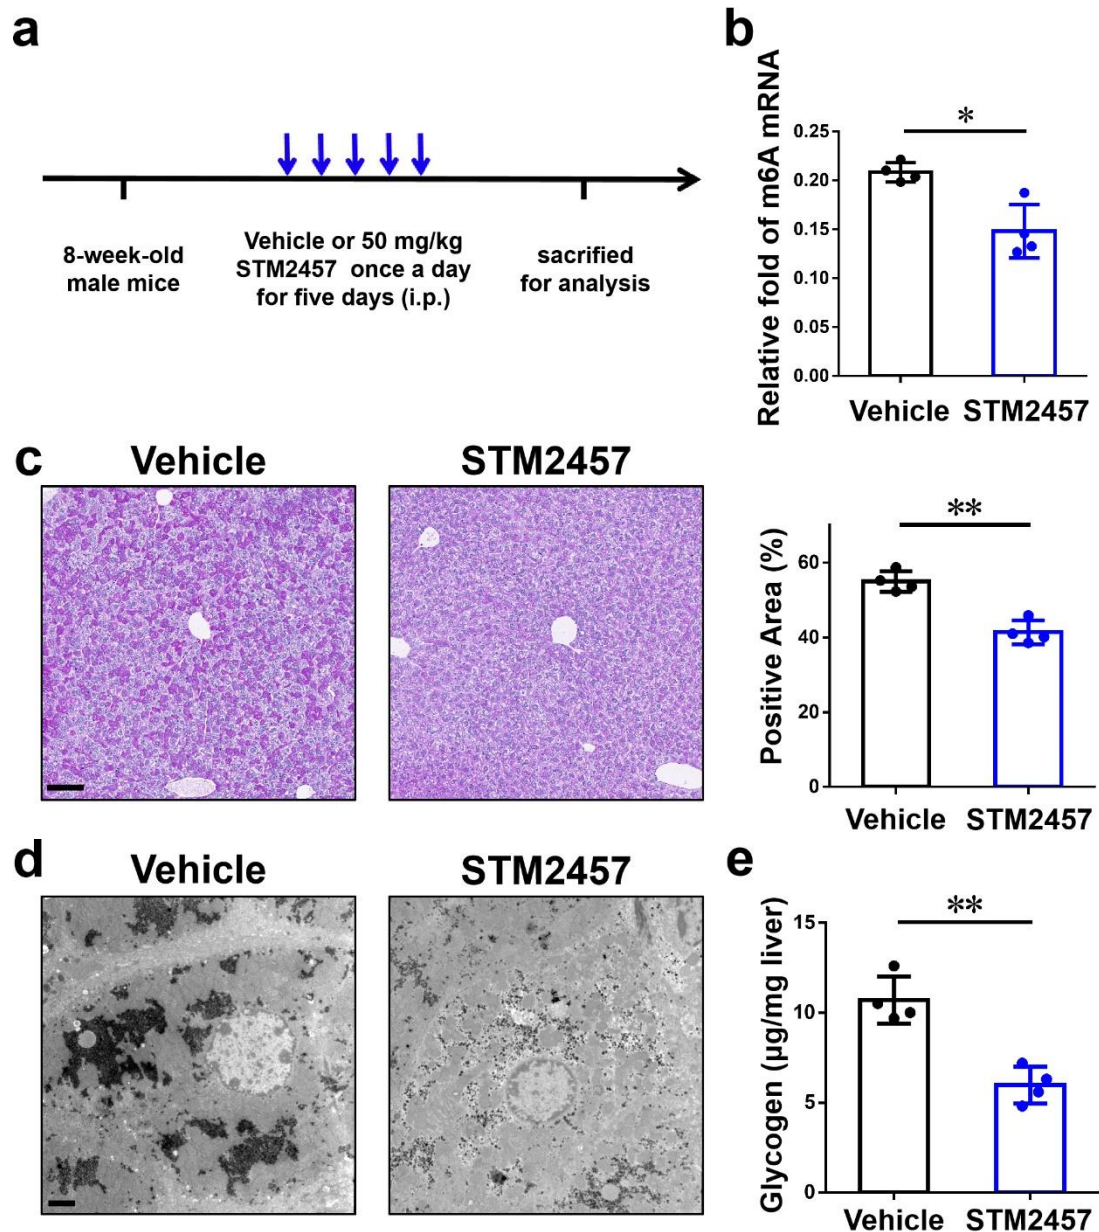

**supplementary Figure 2. Pharmacological inhibition of METTL3 simulates lack of glycogen in liver.** (a) Schematic diagram of strategy to treat mice with vehicle or STM2457. (b) The levels of m6A mRNA were analyzed in livers of different groups.  $n=4$  animals. Data are presented as mean values  $\pm$  SEM. Two-sided Student's t test was performed to determine a difference among groups. \*,  $p = 0.03$ . (c) PAS staining of livers in 8-week-old mice treated by vehicle or STM2457. The percentage of positive area is measured by Image J and shown on the right. Bar,  $100\mu\text{m}$ .  $n=4$  animals. Data are presented as mean values  $\pm$  SEM. Two-sided Student's t test was performed to determine a difference among groups. \*\*,  $p = 0.007$ . (d) Transmission electron microscope pictures of livers in 8-week-old mouse treated by vehicle or STM2457. Bar,  $2\mu\text{m}$ . This experiment was repeated independently with similar results at least 3 times. (e) Hepatic glycogen content of mice treated by vehicle or STM2457.  $n=4$  animals. Data are presented as mean values  $\pm$  SEM. Two-sided Student's t test was performed to determine a difference among groups. \*\*,  $p =$

0.002. Source data are provided as a Source Data file.

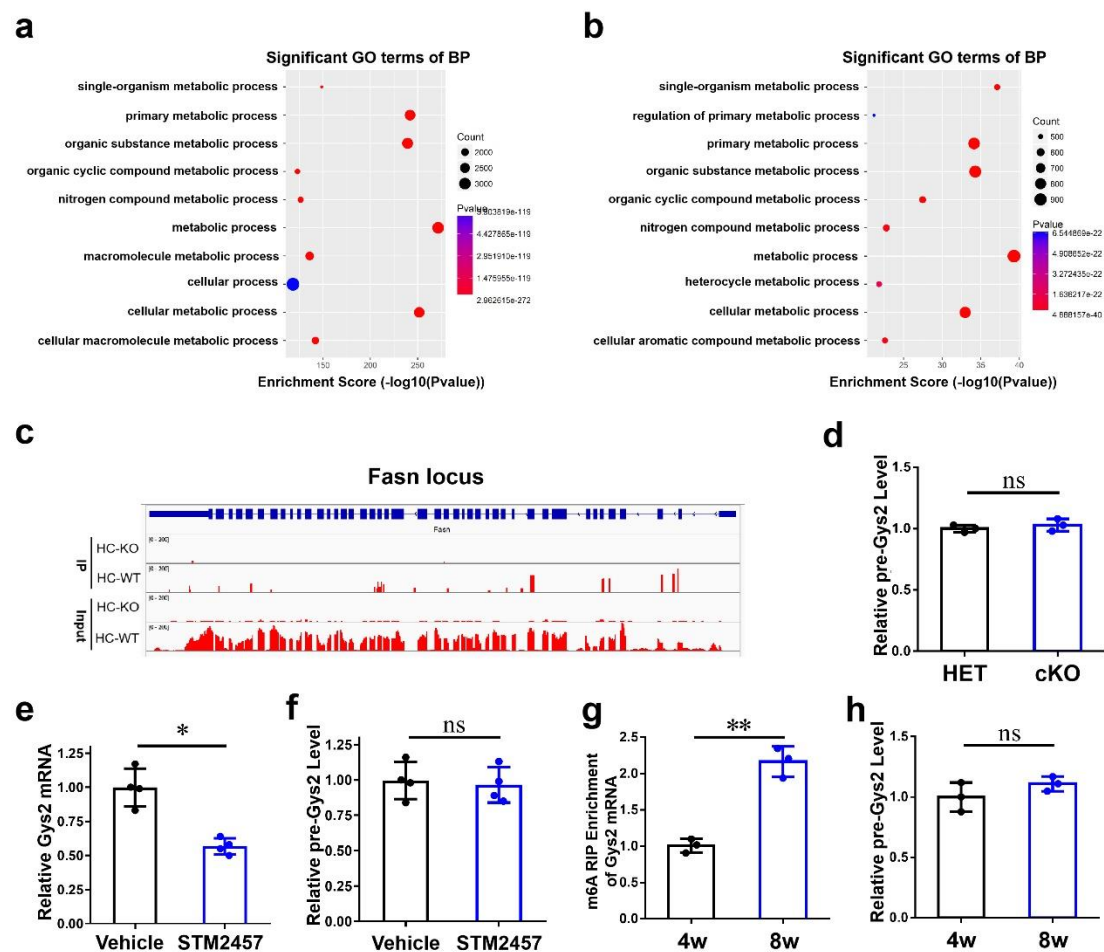

supplementary Figure 3. related to Figure 3. Identification of *Gys2* mRNA by global N6-methyladenosine modification analysis as a key substrate of METTL3 in mouse liver. (a-b) Significantly enriched ( $p$ -value  $\leq 0.01$ , Benjamini–Hochberg multiple testing correction) GO terms of genes with m6A peak loss (a) and down-regulated expression (b) in *Mettl3*-cKO liver. Kolmogorov-Smirnov test was performed to determine significance. (c) m6A MeRIP-Seq revealed the location of specific m6A peak in *Fasn* locus in hepatocytes of wildtype or *Mettl3*-cKO mice. (d) qRT-PCR of pre-*Gys2* (nascent) mRNA levels (18s as reference) in 8-week-old mouse livers with indicated *Mettl3* genotypes.  $n=3$  animals. Data are presented as mean values  $\pm$  SEM. Two-sided Student's t test was performed to determine a difference among groups. ns, not significant. (e) qRT-PCR of mature *Gys2* mRNA levels ( $\beta$ -actin as reference) in 8-week-old mouse livers treated with vehicle or STM2457.  $n=4$  animals. Data are presented as mean values  $\pm$  SEM. Two-sided Student's t test was performed to determine a difference among groups. \*,  $p = 0.02$ . (f) qRT-PCR of pre-*Gys2* (nascent) mRNA levels ( $\beta$ -actin as reference) in 8-week-old mouse livers treated with vehicle or STM2457.  $n=4$  animals. Data are presented as mean values  $\pm$  SEM. Two-sided Student's t test was performed to determine a difference among groups. ns, not significant. (g) m6A enrichment of *Gys2* mRNA in hepatocytes of 4-week-old or 8-week-old wildtype mice by m6A-RIP-qPCR.  $n=3$  animals. Data are presented as mean values  $\pm$  SEM. Two-sided Student's t test was performed to determine a difference among groups.

**\*\***,  $p = 0.009$ . (h) qRT-PCR of pre-Gys2 (nascent) mRNA levels (18s as reference) in wildtype mouse livers with indicated ages.  $n=3$  animals. Data are presented as mean values  $\pm$  SEM. Two-sided Student's t test was performed to determine a difference among groups. ns, not significant. Source data are provided as a Source Data file.

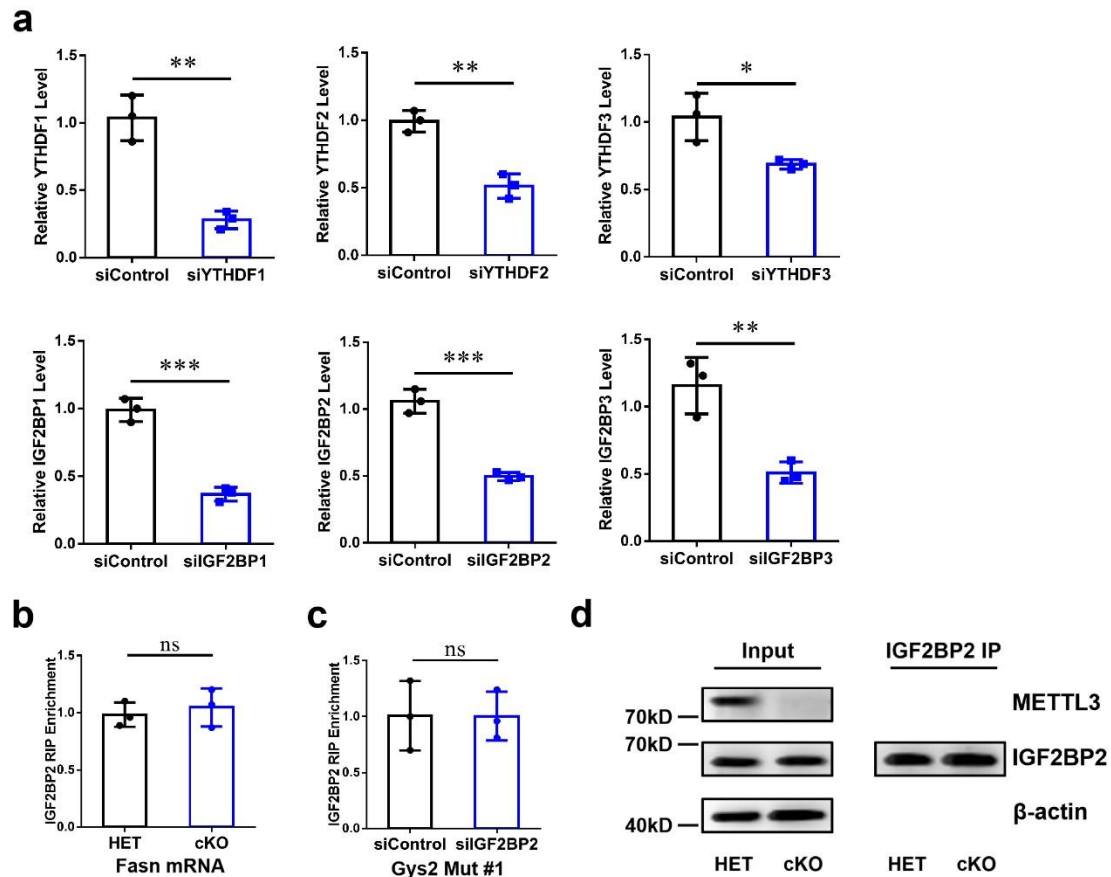

**supplementary Figure 4. related to Figure 4. N6-methyladenosine stabilizes Gys2 mRNA in an IGF2BP2 dependent manner.** (a) qRT-PCR assay of candidate m6A readers' relative mRNA level ( $\beta$ -actin as reference) in siControl and indicated siRNAs.  $n=3$  independent experiments. Data are presented as mean values  $\pm$  SEM. Two-sided Student's t test was performed to determine a difference among groups. \*,  $p = 0.028$  in YTHDF3; \*\*,  $p = 0.002$  in YTHDF1,  $p = 0.002$  in YTHDF2,  $p = 0.007$  in IGF2BP3; \*\*\*,  $p < 0.001$  in IGF2BP1 and IGF2BP2. (b) enrichment of *Fasn* mRNA in mettl3-HET or cKO hepatocytes by IGF2BP2-RIP-qPCR. Two-sided Student's t test was performed to determine a difference between columns. ns, not significant.  $n=3$  animals. Data are presented as mean values  $\pm$  SEM. (c) enrichment of Flag-Gys2-CDS Mut #1 in siControl or siIGF2BP2 Hepa1-6 cells by IGF2BP2-RIP-qPCR.  $n=3$  animals. Data are presented as mean values  $\pm$  SEM. Two-sided Student's t test was performed to determine a difference among groups. ns, not significant. (d) Western blotting assay of indicated genes' protein levels in IGF2BP2-RIP. This experiment was repeated independently with similar results at least 3 times. Source data are provided as a Source Data file.

**supplementary Table 1. Primers used for genotyping analysis.**

| Target      | Forward Primer             | Reverse Primer             |
|-------------|----------------------------|----------------------------|
| Mettl3 loxP | AAAAGGCAATGTGCTTCTATGCCCCG | TGCACGATGATAAAAGCCACTGTAAC |
| Albumin-Cre | TGGCAAACATACGCAAGGG        | CGGCAAACGGACAGAAGCA        |

**supplementary Table 2. Primers used for real-time PCR analysis.**

| Target                           | Forward Primer          | Reverse Primer          |
|----------------------------------|-------------------------|-------------------------|
| mature<br>Gys2<br>(mouse)        | ACCAAGGCCAAAACGACAG     | GGGCTCACATTGTTCTACTTGA  |
| Mettl3<br>(mouse)                | CTGGGCACTTGGATTTAAGGAA  | TGAGAGGTGGTGTAGCAACTT   |
| Aqp8<br>(mouse)                  | TGTGTAGTATGGACCTACCTGAG | ACCGATAGACATCCGATGAAGAT |
| Ythdf1<br>(mouse)                | ACAGTTACCCCTCGATGAGTG   | GGTAGTGAGATACGGGATGGGA  |
| Ythdf2<br>(mouse)                | GAGCAGAGACCAAAGGTCAAG   | CTGTGGGCTCAAGTAAGGTTC   |
| Ythdf3<br>(mouse)                | CATAGGGCAACAGAGGAAACAG  | ATCTCCAGCCGTGGACCAT     |
| Igf2bp1<br>(mouse)               | CGGCAACCTCAACGAGAGT     | GTAGCCGGATTTGACCAAGAA   |
| Igf2bp2<br>(mouse)               | GTCCTACTCAAGTCCGGCTAC   | CATATTCAGCCAACAGCCCAT   |
| Igf2bp3<br>(mouse)               | CCTGGTGAAGACGGGCTAC     | TCAACTTCCATCGGTTTCCCA   |
| Fasn<br>(mouse)                  | GGAGGTGGTGTAGCCGGTAT    | TGGGTAATCCATAGAGCCCAG   |
| $\beta$ -actin<br>(mouse)        | GAGACCTTCAACACCCCAGC    | ATGTCACGCACGATTTCCC     |
| exogenous<br>Gys2 (Flag-<br>tag) | TTACAAGGATGACGACGAT     | GGTCACCTCCAAGAAAC       |
| GFP                              | AGCAAAGACCCCAACGAGAA    | TCGTCCATGCCGAGAGTGAT    |
| pre-Gys2<br>(mouse)              | CCCTGTGGAAGACTTACTG     | GACACCTTCAGAGCCAAT      |
| 18s<br>(mouse)                   | CCCGAAGCGTTTACTTTGA     | ACTTTGGTTTCCCGGAAG      |
| Mettl3<br>(rat)                  | CTGGGCACTTGGACTTAAGGAA  | TGAGAGGTGGTGTAGCAACTT   |
| Gys2<br>(rat)                    | CGCACGTGTTTACCACAGTGT   | CAGGCTTCCTCTTCAGCATGT   |

|                         |                      |                       |
|-------------------------|----------------------|-----------------------|
| $\beta$ -actin<br>(rat) | CCCATCTATGAGGGTTACGC | TTTAATGTCACGCACGATTTC |
|-------------------------|----------------------|-----------------------|

**supplementary Table 3. siRNA used in this study.**

| Target          | Sense (5' to 3')      |
|-----------------|-----------------------|
| siControl       | UUCUCCGAACGUGUCACGUTT |
| YTHDF1 (mouse)  | CCCGUAUCUCACUACCUAUTT |
| YTHDF2 (mouse)  | GGGAUUGACUUCUCAGCAUTT |
| YTHDF3 (mouse)  | GCAGUGGUAUGACUAGCAUTT |
| IGF2BP1 (mouse) | GCCAGCACAUCAAAACACUTT |
| IGF2BP2 (mouse) | GCCGCAUGAUUCUUGAGAUTT |
| IGF2BP3 (mouse) | GGCAGAGGAUUCGUAAACUTT |
