# Supplementary material for: N6-methyladenosine modification governs liver glycogenesis by stabilizing the glycogen synthase 2 mRNA
Source: PubMed Central journal article supplement (PMC9671881; doi:10.1038/s41467-022-34808-2), 2022-11-17
Supplement: 41467_2022_34808_MOESM2_ESM.pdf [file 41467_2022_34808_MOESM2_ESM.pdf]

## Peer Review File

---

N6-methyladenosine modification governs liver glycogenesis by stabilizing the glycogen synthase 2 mRNA

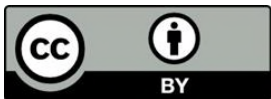

**Open Access** This file is licensed under a Creative Commons Attribution 4.0 International License, which permits use, sharing, adaptation, distribution and reproduction in any medium or format, as long as you give appropriate credit to the original author(s) and the source, provide a link to the Creative Commons license, and indicate if changes were made. In the cases where the authors are anonymous, such as is the case for the reports of anonymous peer reviewers, author attribution should be to 'Anonymous Referee' followed by a clear attribution to the source work. The images or other third party material in this file are included in the article's Creative Commons license, unless indicated otherwise in a credit line to the material. If material is not included in the article's Creative Commons license and your intended use is not permitted by statutory regulation or exceeds the permitted use, you will need to obtain permission directly from the copyright holder. To view a copy of this license, visit <http://creativecommons.org/licenses/by/4.0/>.

Reviewers' comments:

Reviewer #1 (Remarks to the Author):

In this manuscript, Zhang et al. find that that m6A levels in the livers of mice and rats increase with age and that m6A regulates the expression of Gys2 mRNA through the m6A reader protein IGF2BP2. Overall, this works needs to more clearly demonstrate the relationship between m6A, m6A reader proteins and Gys2 expression as stated in the points below:

Major points:

- 1) Liver mRNA m6A levels increase with age of animals. Why is this? A simple explanation could be an increase in the expression of methyltransferase subunits like METTL3, METTL14 or WTAP. It could also be due to decreased expression of demethylases like FTO or ALKBH5. The protein expression of these key m6A machinery components should be analyzed.
- 2) The Methods section lacks details about how the MeRIP-seq data was analyzed. Which programs were used? This is key information that is required to ensure that a robust pipeline was used. Were the peak heights normalized to input to account for changes in expression?
- 3) The authors should show tracks from each replicate for the Gys2 locus in Fig 3g. This will help demonstrate the consistency of the phenotype between replicates. Further, the authors should always show the input tracks as well to account for differences in expression.
- 4) While the IGF2BP family have been described as m6A readers, their exact role in binding m6A is still uncertain. Despite mentioning the critical m6A readers YTHDF1-3, the authors do not investigate whether these have any effect on Gys2 expression. This choice seems rather arbitrary. Therefore, the authors should test whether depletion of YTHDF members influences Gys2 as well.
- 5) The m6A mutants in Figures 4e and 4f are in the CDS. The authors should confirm that these are synonymous mutations and that the amino acid sequence of the proteins is not altered as this is currently not described. This is key as changes in the amino acid sequence may influence protein stability.
- 6) The authors test whether IGF2BP2 binds Gys2 in Figure 4d by depleting the RBP and testing interaction with Gys2. This, of course, indicates that IGF2BP2 depletion reduces the amount of pulled down Gys2 mRNA. However, this is obviously because of reduced IGF2BP2 in the depleted cells in the first place! A critical experiment would be if IGF2BP2 binding to Gys2 is reduced in context of METTL3 depletion or in the cKO. This would demonstrate whether or not IGF2BP2 interaction with Gys2 mRNA is dependent on m6A modification. Immunoblots of Input and IP fractions should be shown for RIP experiments to accurately draw conclusions.
- 7) The authors demonstrate that depletion of IGF2BP2 slightly reduces the stability of Gys2 mRNA. However, is this effect dependent on m6A? The authors should perform similar experiments with the m6A-mutant generated in figure 4e/f in the context of IGF2BP2 depletion (assuming they are synonymous mutants).
- 8) Given that the difference in Gys2 mRNA stability is slight, it is possible that affecting m6A pathways indirectly influences Gys2 mRNA by regulating a transcription factor instead. 4sU pulse chase experiments will determine differences in Gys2 transcription following METTL3 or IGF2BP2 depletion and can also provide insights into differential stability.
- 9) In Figure 4f, what are the RNA levels of the FLAG-tagged WT or m6A-mutant Gys2 constructs? This would help to confirm whether differences in RNA stability/expression are m6A-dependent.

10) Recently, several small molecule inhibitors of the methyltransferase complex have been discovered, including the older DAA and the newer STM2457 (<https://www.nature.com/articles/s41586-021-03536-w>). STM2457 at least can be used in vivo. Does treatment of animals with this inhibitor affect Gys2 mRNA expression?

Minor points:

1) Based on the Methods section, it seems that m6A amount was quantified using the Epigentek m6A quantification kit. This kit calculates the amount of m6A in a given amount of RNA. It cannot calculate an m6A/A ratio as seems to be indicated on the axis titles of these figures. m6A/A can only be determined by LC-MS of digested nucleotides run with proper nucleotide standards. Please confirm that the analysis has been performed accurately and according to kit specifications. An axis title of "% m6A in RNA" will be appropriate for the data presented in Fig 1c, 6b etc.

Reviewer #2 (Remarks to the Author):

#### Key results

The authors present compelling evidence that m6A regulation in the liver of mice is important for the proper storage of glycogen. Stabilization of the mRNA (*Gys2*) that encodes glycogen synthase 2 seems to be dependent on m6A regulation and in the absence of m6A regulation overexpression of the mRNA recovers some of the glycogen storage defects they observe. In what seems to be a unconnected story, they also show that in mice and rats glycogen and glucose storage levels are different between young and adult animals. In addition, the amount of m6A increases in liver RNA as the animals age. The manuscript requires major revisions and a few additional experiments.

#### Validity/ Data and methodology

The experiments seems to be appropriate to draw the conclusions the authors are making. There are however additional analysis and experiments that would strengthen the manuscript and a few places where the authors make conclusions that are not supported by their data. Histology of mice and rat are outside of my expertise.

The meRIP-seq data are very weak as presented. Only because of the authors additional experiments does their main conclusion seem convincing. As presented, I do not think they demonstrate that *Gys2* methylated. Fig3a: is not legible. It would be helpful to also know additional information, such as how many of the transcripts contain this motif. Fig3b. There needs to be an explanation in the methods how this plot was generated. It seems very strange that there are 0 5'UTR peaks. Additional controls/analysis should be presented, such as CIMS analysis to assess the quality of the data and a few examples of known methylations (*Fasn*). Furthermore, additional replicates should be added for this data to be credible. Fig3g. These data need to be normalized in order to make the comparison the authors are trying to make. I am very surprised by the number of meRIP-seq targets identified. Either this is a poor quality data set or the data analysis is overly stringent. There needs to be a much better explanation of the data analysis and a discussion of this in the text. Finally there should be a justification for selecting *Gys2* out of the 27 possible genes to study and perhaps say something about the rest of the genes in the list.

Throughout the manuscript the authors refer to HET as heterogeneous. This seems to be a typo. Do they mean heterozygous? If this is not a typo it significantly changes the meaning/interpretation of the results.

Supplementary Fig. 1c. shows the ratio of m6A to A for control (WT?) vs. conditional knockout of Mettl3 mouse livers. Since the authors use the HETs as controls throughout the manuscript it is essential to show that m6A levels are higher in these animals versus the Mettl3 conditional knockout.

Figure 4f. The most convincing and critical experiment in the manuscript is weakened by mutating two bases. The authors should discuss why they mutated GA and not just the m6A site. Mutating both bases may prevent binding of YTH and have nothing to do with m6A. They should also report whether or not they sequenced their construct and present a detailed schematic of the construct. Furthermore, while the conservation of this site in closely related animals is interesting, it would be more compelling to know that the m6A site they mutate is the one they identified in their MeRIP-seq data.

There is no source data file underlying the figures.

Not all of the sequencing data are uploaded to GEO. (The data uploaded to GEO includes 12 samples (6 IP and 6 Input). The documentation says the data were generated by MeRIP-Seq. This means there are three replicates, but the manuscript says there is one MeRIP-seq data set. There are no RNA-seq data.)

The authors say in lines 185-186, that "MeRIP-qPCR confirmed that Gys2 mRNA was an m6A-regulated target". First, if Gys2 is methylated does not mean m6A is a regulatory mark, and second, a different assay should be used to validate the MeRIP-seq data. These assays (MeRIP-seq and MeRIP-qPCR) are fundamentally the same assay. A different assay such as SCARLET (PMID: 24141618) or similar should be used to validate the RIP.

The model does not seem to come from the data that authors present. They do not show that there are equal levels transcription of Gys2 mRNA in pups and adults, nor do they show that methylation increases in Gys2 mRNA specifically in adult. Furthermore, they show data that suggests that by simply overexpressing Gys2 mRNA Fig. X, you are able to overcome/circumvent the necessity of m6A/IGF2BP2 stabilization of the message.

In line 235 the authors said, "reconstitution of GYS2 activation reversed Mettl3-cKO-associated glycogen deficiency". Their data do not support this claim. They convincingly show that overexpression of GYS2 partially restores glycogen levels, but they do not see a reversal.

The authors conclude in lines 192-293, "And loss of m6A modifications of Gys2 mRNA perish[?] its expression both in RNA and protein levels". They do not have data to backup this claim. The reduction of Gys2 mRNA and protein levels could be an indirect result of removing all mRNA methylation in these cells.

Title: M6A does not govern liver glycogenesis simply through one mRNA (Gys2). Since the authors report a partial rescue of glycogen accumulation upon overexpression to Gys2 there must be other factors involved in the accumulation of glycogen.

----

Supplementary Fig. 1 (line 156) when it should be 1A?

Supplementary Fig. 1b is never mentioned in the text.

Line 162 states that AQP8 was "downregulated". This implies a specific control mechanism which is not supported by the data. Reduced level would be sufficient language and not misleading.

Fig. 4 It is not clear in which system the authors conducted these experiments. Kidney cells or mouse liver? Needs to be more explicit in the results and in the figure legend.

Fig. 4D legend needs to be clearer. I am assuming the authors are using an antibody against IGF2BP2, but it is not in the legend or the results section. This assay also needs a positive and negative control. For example, probe for Fasn in the pulldown.

Supplementary Fig. 2b-f. Authors should show the actual data points and not just the means.

Fig 6c-e. The transcript levels are relative to what?

In section: Reconstitution of GYS2 rescues liver glycogenesis in Mettl3-cKO mice. I do not understand what "activation" of GYS2 means. As I understand it, the authors are overexpressing GYS2 mRNA. Activation makes me think of turning on the protein (for example, through phosphorylation) not just making more.

Elucidate/justify the reasoning for using a kidney derived cell line(HEK-293T) when studying the liver.

The introduction could be improved by contextualizing the function of Gys2 in the context of glycogen storage and glucose homeostasis, in particular since Gys2 is the gene that the paper investigates most fully.

Useful discussion point would be why is there more GYS2 protein being made even though the m6A regulation is removed.

The presentation of the figures for was adequate except for Figs. 3 and 4, though there is considerable sloppiness throughout with inconsistent sizing (figures and fonts) and alignment issues. The presentation of figure 3 could be greatly improved. The fonts are unreadable for panels 3a-d and panel 3f should show the actual data points not just the means. Likewise Fig. 4 should show the data points not just the mean/median.

#### Analytical approach

The analytical approach is not sufficient. The authors test multiple hypotheses simultaneously in many figures so they need to correct their statistical analysis for type 1 error. The figure legends could also be improved by reporting the statistical tests used. There needs to be much more detail in the methods sections for all the analysis done, in particular for the miRIP-seq experiment.

#### Reviewer #3 (Remarks to the Author):

This paper provides evidence that the N6-methyl modification of glycogen synthase mRNA plays an important role in regulating the expression of glycogen synthase and therefore the level of glycogen in the liver.

1. The findings provide novel insight into the regulation of liver glycogen synthase and glycogen levels. The findings are therefore of major significance to the field.
2. The most important point of the paper, i.e. that glycogen synthase mRNA is stabilized by m6A modification, is well documented.
3. In contrast, the relationship between liver glycogen level and m6A modification, and the amount of glycogen synthase protein is not convincing. Liver glycogen levels were measured by a qualitative assay. A quantitative assay should have been used. To conclude that liver glycogen levels correlate with m6A modification, more animals of different ages should have been used. Suckling mice/rats are on a very high-fat diet (milk). Four-week-old mice are transitioning from a high-fat diet to a high carbohydrate diet. Five-week-old mice would have been more appropriate. The literature references on age versus liver glycogen levels were for different species and therefore not relevant. In a study with mice, Roesler and Khandelwal, *Diabetes* 1985; 34: 395-402, did not find an increase in liver

glycogen with age. The relationship between age and glycogen levels is not on solid ground.

4. Whether m6A correlates with glycogen synthase protein amount is a critical issue. Rather than simply showing western blot analysis with for one sample from each group, experiments should have been run that allowed statistical analysis for this important point.

5. Since glycogen synthase activity is subject to regulation by covalent modification, the paper would have been strengthened by measuring glycogen synthase activity with and without glucose-6-phosphate which completely activates the enzyme.

6. More information should have been provide about the time that blood samples were taken from the mice

7. The authors assume that blood glucose levels are reduced by m6A deficiency because liver glycogen levels are reduced. However, this was measured in the fed state. Since glycogen synthase plays an important role in lowering blood glucose levels, it seems that the absence of glycogen synthase should in crease rather than decrease blood glucose. In other words, maybe liver glycogen levels are reduced because blood glucose levels are reduced for some other reason. Since m6A clearly regulates many enzymes, it seems likely that the situation is not as simple as presented by the authors. Most likely enzymes of gluconeogenesis are affected by the status of m6A. Likewise, enzymes that utilize gluconeogenic substrates, such as pyruvate dehydrogenase, may be affected by the status of m6A. Since these factors regulate blood glucose levels, the situation may be more complicated than presented by the authors.

1 Dear editor,

2 Here is our revised manuscript NCOMMS-21-47107A-Z with a complete point-to-point response  
3 to the reviewers' comments.

4 Reviewers' comments:

5 Reviewer #1 (Remarks to the Author):

6 In this manuscript, Zhang et al. find that that m6A levels in the livers of mice and rats increase  
7 with age and that m6A regulates the expression of Gys2 mRNA through the m6A reader protein  
8 IGF2BP2. Overall, this works needs to more clearly demonstrate the relationship between m6A,  
9 m6A reader proteins and Gys2 expression as stated in the points below:

10 **Response:** We thank the reviewer for evaluating our paper carefully and giving us valuable  
11 suggestions. We agree with the reviewer and conducted more experiments to make our conclusion  
12 more compelling now. We hope that the reviewers will be satisfied with the revised version of our  
13 manuscript.

14

15 Major points:

16 1) Liver mRNA m6A levels increase with age of animals. Why is this? A simple explanation  
17 could be an increase in the expression of methyltransferase subunits like METTL3, METTL14 or  
18 WTAP. It could also be due to decreased expression of demethylases like FTO or ALKBH5. The  
19 protein expression of these key m6A machinery components should be analyzed.

20 **Response:** To globally analyze the expression pattern of machinery components of  
21 methyltransferase and demethyltransferase, we analyzed the developmental dynamics of the  
22 mouse liver transcriptome in the open database (GSE58827). We found that only *mettl3* but not  
23 any other machinery components of methyltransferase and demethyltransferase has a significant  
24 increase with age of mice (Figure 2a). To further confirm this finding, we performed Western blot  
25 to test the expression pattern of mettl3 in the protein level, As shown in the figure 2b, the protein  
26 level of mettl3 increases gradually from 4-week-old to 8-week-old in the mouse liver. These  
27 results confirmed that it was reasonable to generate Mettl3-cKO mice in our study.

28

29 2) The Methods section lacks details about how the MeRIP-seq data was analyzed. Which  
30 programs were used? This is key information that is required to ensure that a robust pipeline was  
31 used. Were the peak heights normalized to input to account for changes in expression?

32 **Response:** In the revised method section, we showed detailed information for analysis of  
33 MeRIP-seq and the programs we used in lines 533-549 on page 15.

34 And we also showed it in the following: MeRIP-Seq was performed by Cloudseq Biotech Inc.  
 35 (Shanghai, China) according to the published procedure (Meyer et al., 2012) with slight  
 36 modifications. Briefly, m6A RNA immunoprecipitation was performed with the GenSeq™ m6A  
 37 RNA IP Kit (GenSeq Inc., China) by following the manufacturer’s instructions. Both the input  
 38 sample without immunoprecipitation and the m6A IP samples were used for RNA-seq library  
 39 generation with NEBNext® Ultra II Directional RNA Library Prep Kit (New England Biolabs, Inc.,  
 40 USA). The library quality was evaluated with BioAnalyzer 2100 system (Agilent Technologies,  
 41 Inc., USA). Library sequencing was performed on an illumina Hiseq instrument with 150bp  
 42 paired-end reads. Paired-end reads were harvested from Illumina HiSeq 4000 sequencer, and were  
 43 quality controlled by Q30. After 3’ adaptor-trimming and low-quality reads removing by cutadapt  
 44 software (v1.9.3). First, clean reads of all libraries were aligned to the reference genome (UCSC  
 45 MM10) by Hisat2 software (v2.0.4). Methylated sites on RNAs (peaks) were identified by MACS  
 46 software. Differentially methylated sites were identified by diffReps. These peaks identified by  
 47 both softwares overlapping with exons of mRNA were figured out and chosen by home-made  
 48 scripts. GO and Pathway enrichment analysis were performed by the differentially methylated  
 49 protein coding genes.

50 Finally, each meRIP-seq data had its own input RNA-seq data for normalization. Take figure 3d  
 51 for example, four dominant meRIP peaks were marked from a to d as follows (Attached Figure 1).  
 52 The heights of each peak and ratio between associated two peaks were listed in Attached Table 1  
 53 below. These results demonstrated loss of peaks in HC-KO.

54

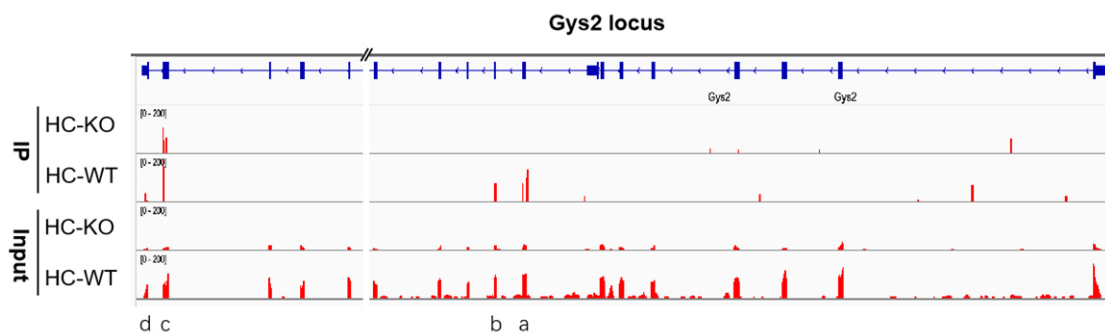

55

56 Attached Figure 1. m6A MeRIP-Seq (IP) and RNA-seq (Input) revealed the location of specific  
 57 m6A peaks and expression peaks in Gys2 locus in hepatocytes of wildtype or Mettl3-cKO mice.

58

59 Attached Table 1. Peaks’ heights and their ratio in Attached Figure 1.

|          | Site a | Site b | Site c | Site d |
|----------|--------|--------|--------|--------|
| IP HC-KO | 0      | 0      | 106    | 0      |



|                |      |      |       |      |
|----------------|------|------|-------|------|
| IP HC-WT       | 76   | 77   | 176   | 37   |
| Input HC-KO    | 25   | 20   | 8     | 6    |
| Input HC-WT    | 105  | 103  | 105   | 60   |
| HC-KO IP/Input | 0    | 0    | 13.25 | 0    |
| HC-WT IP/Input | 0.72 | 0.75 | 1.68  | 0.62 |

60

61 3) The authors should show tracks from each replicate for the *Gys2* locus in Fig 3g. This will help  
62 demonstrate the consistency of the phenotype between replicates. Further, the authors should  
63 always show the input tracks as well to account for differences in expression.

64 **Response:** The reviewer's point is well taken. Among six samples from *Mettl3* wild-type or cKO  
65 mice, four samples are liver tissues and two ones are primary hepatocytes. Because of limited  
66 depth of m6A MeRIP-seq, we only detected m6A peaks in *Gys2* mRNA from hepatocyte samples  
67 (Figure 3d). It is consistent with the fact that *Gys2* is a hepatocyte-specific gene in liver. However,  
68 in input (RNA-seq) data of all six samples, not only hepatocytes but liver tissues in *Mettl3*-cKO  
69 mice had lower expression than *Mettl3* wild-type ones (Figure 3d and Attached Figure 2 below).  
70 Intriguingly, *Fasn*, another hepatocyte-specific m6A regulated gene in liver, has very similar  
71 pattern to *Gys2* in our data (supplementary Figure 3c and Attached Figure 3 below). These results  
72 demonstrated that *Gys2* mRNA might also be m6A methylated in hepatocytes.

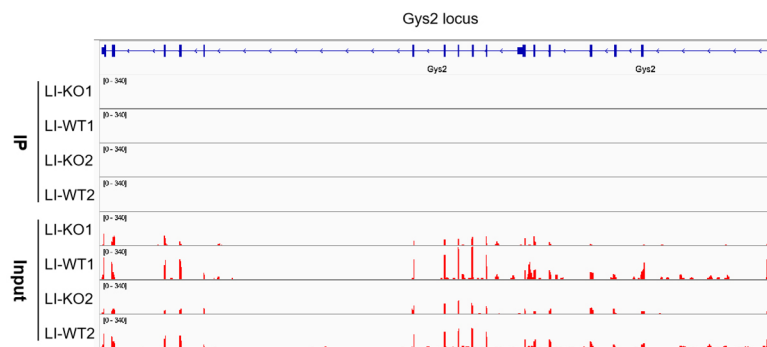

73

74 Attached Figure 2. m6A MeRIP-Seq and input RNA-seq in *Gys2* locus in liver tissues of wildtype  
75 or *Mettl3*-cKO mice.

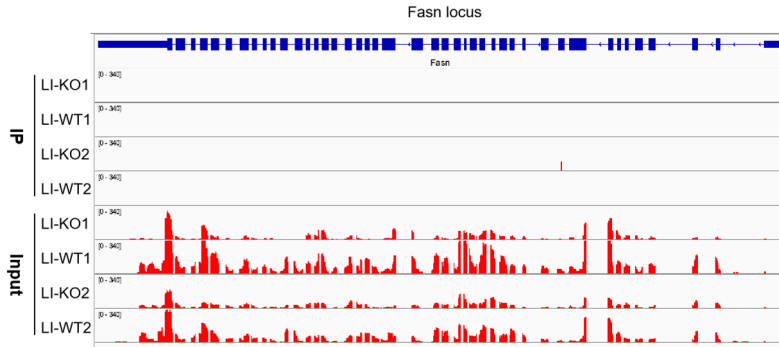

76

77 Attached Figure 3. m6A MeRIP-Seq and input RNA-seq in Fasn locus in liver tissues of wildtype  
78 or Mettl3-cKO mice.

79 New GEO dataset had been uploaded online, and the number is GSE207566  
80 (<https://www.ncbi.nlm.nih.gov/geo/query/acc.cgi?acc=GSE207566>), secure token for reviewers:  
81 ytereeyorfqbhyt.

82

83 4) While the IGF2BP family have been described as m6A readers, their exact role in binding m6A  
84 is still uncertain. Despite mentioning the critical m6A readers YTHDF1-3, the authors do not  
85 investigate whether these have any effect on Gys2 expression. This choice seems rather arbitrary.  
86 Therefore, the authors should test whether depletion of YTHDF members influences Gys2 as well.

87 **Response:** According to the reviewer's suggestion, we did all mentioned experiments. To establish  
88 a functional link between the m6A readers and Gys2, we knocked down YTHDF1/2/3 and  
89 IGF2BP1/2/3 one by one in Hepa1-6 cells which has a relative high level of Gys2 expression.  
90 And we found that only depletion of IGF2BP2 significantly dampens the mRNA level of Gys2  
91 (Figure 4a, supplementary Figure 4a).

92 In addition, we referred to IMPC (International Mouse Phenotyping Consortium), a famous mouse  
93 phenotype website (<https://www.mousephenotype.org/>). Data also suggested that YTHDF2 or  
94 IGF2BP3 KO mice have no phenotype in liver and YTHDF3 or IGF2BP1 KO mice have normal  
95 blood glucose level. So, we can exclude these four m6A readers in our study.

96

97 5) The m6A mutants in Figures 4e and 4f are in the CDS. The authors should confirm that these  
98 are synonymous mutations and that the amino acid sequence of the proteins is not altered as this is  
99 currently not described. This is key as changes in the amino acid sequence may influence protein  
100 stability.

101 **Response:** In the former manuscript, we constructed a mutant form of Gys2 with "GGA" to  
102 "GCT" shift as shown below (Attached Figure 4). As a result, a glycine changed to alanine. So,  
103 we build a new synonymous mutant construct with "GGA" to "GGT" shift, however, the protein  
104 level of exogenous Gys2 have no significant change (data not shown). So, we have to say that the

105 change in the amino acid sequence may influence protein stability, but we don't know the detail  
106 mechanism.

107 In order to find the real m6A modification sites, we analyzed the sequences of different m6A  
108 peaks in hepatocytes' MeRIP-seq by a SRAMP online tool (<http://www.cuilab.cn/sramp>), and we  
109 got two candidate sites (Figure 4d). Then, we built two different mouse mutant constructs (Figure  
110 4d). qRT-PCR (Figure 4e) and Western blot assay (Figure 4f) in Hepa1-6 cells showed that +1172,  
111 not +2111, is the site of m6A modification. What's more, we also built one wildtype (WT) and  
112 two mutant (Mut) Luc-Gys2 fusion constructs (Figure 4d), dual luciferase report assay confirmed  
113 +1172 (site 1 in Mut #1) is the site of m6A modification.

**Gys2-CDS**  
**WT**

Mouse 1380-1402 TAGACGAATC**GGACT**TTTCAACA  
Rat 1380-1402 TCGACGAATT**GGACT**TTTCAACA  
Cat 1380-1402 TAGACGGATC**GGACT**TTTCAACA  
Dog 1380-1402 TAGACGGATT**GGACT**TTTCAACA  
Rhesus monkey 1380-1402 TAGACGGATC**GGACT**TTTCAACA  
Chimpanzee 1380-1402 TAGACGGATT**GGACT**TTTCAACA  
Human 1380-1402 TAGACGGATT**GGACT**TTTCAACA

**Gys2-CDS**  
**Mut**

from Human 1380-1402 TAGACGGATT**GCT**TTTCAACA



114  
115 Attached Figure 4. former figure 4e.

116

117 6) The authors test whether IGF2BP2 binds Gys2 in Figure 4d by depleting the RBP and testing  
118 interaction with Gys2. This, of course, indicates that IGF2BP2 depletion reduces the amount of  
119 pulled down Gys2 mRNA. However, this is obviously because of reduced IGF2BP2 in the  
120 depleted cells in the first place! A critical experiment would be if IGF2BP2 binding to Gys2 is  
121 reduced in context of METTL3 depletion or in the cKO. This would demonstrate whether or not  
122 IGF2BP2 interaction with Gys2 mRNA is dependent on m6A modification. Immunoblots of Input  
123 and IP fractions should be shown for RIP experiments to accurately draw conclusions.

124 **Response:** According to the reviewer's suggestion, we did the RIP-qPCR assay in the Mettl3-HET  
125 and Mettl3-cKO hepatocytes, respectively. As shown in the revised Figure 4c, Gys2 mRNA was  
126 enriched by IGF2BP2 antibody in HET cells while this enrichment was dampened in cKO cells.  
127 And the result of immunoblot of input and IP fractions were shown in the supplementary Figure  
128 4d.

129

130 7) The authors demonstrate that depletion of IGF2BP2 slightly reduces the stability of Gys2  
131 mRNA. However, is this effect dependent on m6A? The authors should perform similar  
132 experiments with the m6A-mutant generated in figure 4e/f in the context of IGF2BP2 depletion  
133 (assuming they are synonymous mutants).

134 **Response:** According to the reviewer's suggestion, we did mRNA stability analysis in Hepa 1-6  
135 cells, and found that depletion of IGF2BP2 robustly reduces the stability of Gys2 mRNA (Figure  
136 4b). Meanwhile, IGF2BP2-RIP-qPCR assay in Hepa 1-6 cells, based on constructs and primers  
137 shown in Figure 4d. It is wild type, not m6A site mutant #1, Flag-Gys2 mRNA was diminished  
138 with IGF2BP2 depletion in RIP-qPCR assay (Figure 4h, supplementary Figure 4c). These results  
139 demonstrated that IGF2BP2 protein binds to Gys2 mRNA in an m6A dependent manner.

140

141 8) Given that the difference in Gys2 mRNA stability is slight, it is possible that affecting m6A  
142 pathways indirectly influences Gys2 mRNA by regulating a transcription factor instead. 4sU pulse  
143 chase experiments will determine differences in Gys2 transcription following METTL3 or  
144 IGF2BP2 depletion and can also provide insights into differential stability.

145 **Response:** Firstly, we did did mRNA stability analysis in Hepa 1-6 cells, and found that depletion  
146 of IGF2BP2 robustly reduces the stability of Gys2 mRNA (Figure 4b).

147 Second, for transcription factor issue, given that 4-thiouridine (4sU) has effects on rRNA  
148 synthesis and causes a nucleolar stress response (RNA Biol. 2013 Oct;10(10):1623-30.), we  
149 detected nascent mRNA of Gys2 in different genotype mouse livers, another direct assay to  
150 answer this question. As the results shown in Figure 3f and supplementary Figure 3d, mature  
151 mRNA of Gys2 was much lower in Mettl3-cKO livers than Mettl3-HET ones, however, Gys2  
152 nascent mRNA had almost the same expression level in Mettl3-HET and cKO livers. Similar  
153 results were also observed in STM2457 (catalytic inhibitor of METTL3) treatment assay  
154 (supplementary Figure 3e-f). Taken together, depletion or pharmacological inhibition of METTL3  
155 had no significant effect on transcription of Gys2 mRNA. Stability of Gys2 mRNA still should be  
156 the main concern in this study.

157

158 9) In Figure 4f, what are the RNA levels of the FLAG-tagged WT or m6A-mutant Gys2 constructs?  
159 This would help to confirm whether differences in RNA stability/expression are m6A-dependent.

160 **Response:** Except for western blot and dual luciferase report assays in Figure 4f-g, in the revised  
161 Figure 4e, exogenous FLAG-tagged WT Gys2 construct had higher RNA level than the  
162 m6A-mutant one (Mut #1) in Hepa 1-6 cells. This result demonstrated that the differences in RNA  
163 stability/expression should be m6A-dependent.

164

165 10) Recently, several small molecule inhibitors of the methyltransferase complex have been  
166 discovered, including the older DAA and the newer STM2457  
167 (<https://www.nature.com/articles/s41586-021-03536-w>). STM2457 at least can be used in vivo.  
168 Does treatment of animals with this inhibitor affect Gys2 mRNA expression?

169 **Response:** According to the reviewer's suggestion, eight-week-old male mice were sacrificed after  
170 i.p. treatment with vehicle or 50 mg/kg STM2457 each day for 5 days (supplementary Figure 2a).

171 PAS staining (supplementary Figure 2c), transmission electron microscopy (supplementary Figure  
172 2d) and glycogen content assay (supplementary Figure 2e) showed that STM2457-treated mice  
173 had much less glycogen in liver tissues. In addition, relative fold of m6A mRNA and Gys2 mRNA  
174 level were both diminished in hepatocytes of STM2457-treated mice (supplementary Figure 2b,  
175 supplementary Figure 3e).

176

177 Minor points:

178 1) Based on the Methods section, it seems that m6A amount was quantified using the Epigentek  
179 m6A quantification kit. This kit calculates the amount of m6A in a given amount of RNA. It  
180 cannot calculate an m6A/A ratio as seems to be indicated on the axis titles of these figures.  
181 m6A/A can only be determined by LC-MS of digested nucleotides run with proper nucleotide  
182 standards. Please confirm that the analysis has been performed accurately and according to kit  
183 specifications. An axis title of “% m6A in RNA” will be appropriate for the data presented in Fig  
184 1c, 6b etc.

185 **Response:** As the reviewer said, we used the EpiQuik m6A RNA Methylation Quantification Kit  
186 (Epigentek, # P-9005) to quantify relative fold of m6A mRNA. So, we changed the axis title to  
187 “Relative fold of m6A mRNA” in figure 1d, 6c, supplementary figure 1c, 2b.

188

189 Reviewer #2 (Remarks to the Author):

190

191 Key results

192 The authors present compelling evidence that m6A regulation in the liver of mice is important for  
193 the proper storage of glycogen. Stabilization of the mRNA (Gys2) that encodes glycogen synthase  
194 2 seems to be dependent on m6A regulation and in the absence of m6A regulation overexpression  
195 of the mRNA recovers some of the glycogen storage defects they observe. In what seems to be a  
196 unconnected story, they also show that in mice and rats glycogen and glucose storage levels are  
197 different between young and adult animals. In addition, the amount of m6A increases in liver  
198 RNA as the animals age. The manuscript requires major revisions and a few additional  
199 experiments.

200 Validity/ Data and methodology

201 The experiments seems to be appropriate to draw the conclusions the authors are making. There  
202 are however additional analysis and experiments that would strengthen the manuscript and a few  
203 places where the authors make conclusions that are not supported by their data. Histology of mice  
204 and rat are outside of my expertise.

205 **Response:** We thank the reviewer for evaluating our paper carefully and giving us valuable  
206 suggestions. We agree with the reviewer and conducted more experiments to make our conclusion  
207 more compelling now. We hope that the reviewers will be satisfied with the revised version of our  
208 manuscript.

209

210 1. The meRIP-seq data are very weak as presented. Only because of the authors additional  
211 experiments does their main conclusion seem convincing. As presented, I do not think they  
212 demonstrate that Gys2 methylated.

213 **Response:** This is an important and similar question from the first reviewer, and we have answered  
214 it in Major Question 3 above.

215

216 2. Fig3a: is not legible. It would be helpful to also know additional information, such as how many  
217 of the transcripts contain this motif.

218 **Response:** According to the reviewer's suggestion, we analyzed the meRIP-seq data in  
219 hepatocytes (HC) and liver tissues (LI) from both wildtype and cKO mice. The most enriched  
220 motif of m6A peaks and p values of these peaks were shown in revised Figure 3a. In addition, the  
221 percentages of indicated peaks, from top to bottom in Figure 3a, were 20.17%, 24.64%, 36.51%,  
222 22.01%, 29.25% and 15.99% in total target peaks, respectively.

223

224 3. Fig3b. There needs to be an explanation in the methods how this plot was generated. It seems  
225 very strange that there are 0 5'UTR peaks. Additional controls/analysis should be presented, such  
226 as CIMS analysis to assess the quality of the data and a few examples of known methylations  
227 (Fasn). Furthermore, additional replicates should be added for this data to be credible.

228 **Response:** In Figure 3b, the peak density plot was visualized by R package Trumpet  
229 (<https://github.com/skyhorsetomoon/Trumpet>). In addition, we analyzed the number of 5'UTR  
230 peaks, and found that the percentages of these peaks were 4.56%, 5.89%, 11.48%, 11.51%,  
231 11.60%, 11.54% (with an average of 9.43%). Meanwhile, we referred to three m6A associated  
232 articles published recently (Figure 3a of Nature. 2021 Mar;591(7849):312-316. Figure 4a of  
233 Nature. 2021 Mar;591(7849):317-321. Extended Data Figure 3q of Nature. 2019 Mar;  
234 567(7748):414-419.). Similar to our result, there are only a few m6A peaks in 5'UTR.

235 Crosslinking induced mutation site (CIMS) analysis is a method to evaluate the mutations induced  
236 by crosslinking. However, we used meRIP-seq, a crosslinking free method, to detect m6A  
237 modification in this study. So, it is not necessary to concern about crosslinking associated  
238 mutation here. What's more, as shown in Figure 3d and supplementary Figure 3c, m6A peaks in  
239 Gys2 and Fasn (positive control) loci were analyzed, and the enrichment peaks in Gys2 locus and  
240 Fasn locus also have similar height.

241 Finally, in the revised manuscript we used three samples' data from each genotype to perform  
242 density assay in Figure 3b.

243

244 4. Fig3g. These data need to be normalized in order to make the comparison the authors are trying  
245 to make. I am very surprised by the number of meRIP-seq targets identified. Either this is a poor  
246 quality data set or the data analysis is overly stringent. There needs to be a much better  
247 explanation of the data analysis and a discussion of this in the text. Finally there should be a  
248 justification for selecting Gys2 out of the 27 possible genes to study and perhaps say something  
249 about the rest of the genes in the list.

250 **Response:** In order to enhance the representativeness of the screening, here we used four pairs of  
251 different datasets to analyze. The meRIP-seq dataset contained methylation-downregulated genes  
252 in hepatocytes between Mettl3-cKO and Mettl3-WT mice (Fold change  $\geq 2000$ , P value  $< 1e-15$ ).  
253 The other three RNA-seq datasets came from downregulated genes in hepatocytes, male liver  
254 tissues and female liver tissues of 8-week-old Mettl3-cKO mice, respectively. That is why there  
255 were so many different genes between each two sets. However, Gys2 and other twenty-five genes  
256 were still enriched by this stringent strategy, it suggested that they should be *bona fide* candidates.  
257 We focused on Gys2 by a method of exclusion. Among these 26 candidate genes, only Mlxipl,  
258 Egfr, Fasn and Gys2 were relative to glycogen in literature. Mlxipl is a deleted gene in  
259 Williams-Beuren syndrome, however, glycogen storage defect and hypoglycemia (two main  
260 phenotypes of Mettl3-cKO mice) are not symptoms of this syndrome. According to IMPC  
261 (International Mouse Phenotyping Consortium), glycogen storage defect and hypoglycemia are  
262 not phenotype of Egfr-KO mice. Fasn, a key enzyme in fatty acid synthesis, is thought to be less  
263 associated with glycogen synthesis, although glycometabolism and lipid metabolism are  
264 connected. Finally, we focused on Gys2 which is liver glycogen synthase and catalyzes the  
265 rate-limiting step in the synthesis of glycogen. It has been reported that loss-of-function mutations  
266 of Gys2 cause type 0 glycogen storage disease (GSD-0) in children, who have glycogen storage  
267 defect and hypoglycemia as main symptoms. Taken together, Gys2 may play dominant role in  
268 m6A mediated glycogen storage in liver.

269

270 5. Throughout the manuscript the authors refer to HET as heterogeneous. This seems to be a typo.  
271 Do they mean heterozygous? If this is not a typo it significantly changes the  
272 meaning/interpretation of the results.

273 **Response:** HET is abbreviation of heterozygous here, means mice with albumin-cre<sup>+</sup> Mettl3<sup>w<sup>t</sup>/fl</sup>  
274 genotype.

275

276 6. supplementary Fig. 1c. shows the ratio of m6A to A for control (WT?) vs. conditional knockout  
277 of Mettl3 mouse livers. Since the authors use the HETs as controls throughout the manuscript it is  
278 essential to show that m6A levels are higher in these animals verses the Mettl3 conditional  
279 knockout.

280 **Response:** In supplementary Figure 1c of former manuscript, "Control" means heterozygous mice  
281 with Albumin-cre<sup>+</sup> Mettl3<sup>w<sup>t</sup>/fl</sup> genotype. In the revised manuscript, we showed data from WT, HET  
282 and cKO mice in supplementary Figure 1c.

283



284 7. Figure 4f. The most convincing and critical experiment in the manuscript is weakened by  
285 mutating two bases. The authors should discuss why they mutated GA and not just the m6A site.  
286 Mutating both bases may prevent binding of YTH and have nothing to do with m6A. They should  
287 also report whether or not they sequenced their construct and present a detailed schematic of the  
288 construct. Furthermore, while the conservation of this site in closely related animals is interesting,  
289 it would be more compelling to know that the m6A site they mutate is the one they identified in  
290 their meRIP-seq data.

291 **Response:** This is an important and similar question from the first reviewer, and we have answered  
292 it in Major Question 5 above.

293

294 8. There is no source data file underlying the figures.

295 **Response:** Source data of this manuscript are available in the attachment.

296

297 9. Not all of the sequencing data are uploaded to GEO. (The data uploaded to GEO includes 12  
298 samples (6 IP and 6 Input). The documentation says the data were generated by MeRIP-Seq. This  
299 means there are three replicates, but the manuscript says there is one MeRIP-seq data set. There  
300 are no RNA-seq data.)

301 **Response:** New GEO dataset had been uploaded online, and the number is GSE207566  
302 (<https://www.ncbi.nlm.nih.gov/geo/query/acc.cgi?acc=GSE207566>), secure token for reviewers:  
303 ytereeyorfqbhyt.

304 10. The authors say in lines 185-186, that “MeRIP-qPCR confirmed that Gys2 mRNA was an  
305 m6A-regulated target”. First, if Gys2 is methylated does not mean m6A is a regulatory mark, and  
306 second, a different assay should be used to validate the MeRIP-seq data. These assays (MeRIP-seq  
307 and MeRIP-qPCR) are fundamentally the same assay. A different assay such as SCARLET  
308 (PMID: 24141618) or similar should be used to validate the RIP.

309 **Response:** Firstly, we did meRIP-qPCR by m6A antibody from a Magna MeRIP™ m6A Kit  
310 (17-10499-1, Millipore), so the enriched mRNA should be methylated by m6A.

311 Second, as mentioned above, in order to find the real m6A modification sites, we analyzed the  
312 sequences of different m6A peaks in hepatocytes' MeRIP-seq by a SRAMP online tool  
313 (<http://www.cuilab.cn/sramp>), and we got two candidate sites (Figure 4d). Then, we built two  
314 different mouse mutant constructs (Figure 4d). qRT-PCR (Figure 4e) and Western blot assay  
315 (Figure 4f) in Hepa1-6 cells showed that +1172, not +2111, is the site of m6A modification.  
316 What's more, we also built one wildtype (WT) and two mutant (Mut) Luc-Gys2 fusion constructs  
317 (Figure 4d), dual luciferase report assay confirmed +1172 (site 1 in Mut #1) is the site of m6A  
318 modification.

319 Taken together, it demonstrated that Gys2 mRNA is methylated in +1172 and this modification  
320 plays important role on Gys2 expression.

321

322 10-2. The model does not seem to come from the data that authors present. They do not show that  
323 there are equal levels transcription of Gys2 mRNA in pups and adults, nor do they show that  
324 methylation increases in Gys2 mRNA specifically in adult. Furthermore, they show data that  
325 suggests that by simply overexpressing Gys2 mRNA Fig. X, you are able to overcome/circumvent  
326 the necessity of m6A/IGF2BP2 stabilization of the message.



327 **Response:** Firstly, we detected the nascent and mature mRNA of Gys2 in hepatocytes of  
328 4-week-old and 8-week-old wildtype mice by qPCR assay. The results showed that the level of  
329 mature Gys2 mRNA was higher in 8-week-old mouse hepatocytes than 4-week-old ones (Figure  
330 3h), however, the nascent mRNA level of Gys2 had no significant difference between ages  
331 (supplementary Figure 3h). Secondly, we did meRIP-qPCR assays in 4-week-old and 8-week-old  
332 mouse hepatocytes. The result demonstrated that mature Gys2 mRNA is higher enriched in  
333 8-week-old mouse hepatocytes compared with it in 4-week-old ones (supplementary Figure 3g).  
334 In summary, we could get a conclusion that the nascent mRNA of Gys2 could be transcribed  
335 similarly in hepatocytes between pups and adults, but different Mettl3 expression levels (Figure  
336 2a-b) might lead to different m6A modification levels in nascent and mature mRNA of Gys2, then  
337 caused different stability of mature Gys2 mRNA.

338

339 11. In line 235 the authors said, “reconstitution of GYS2 activation reversed  
340 Mettl3-cKO-associated glycogen deficiency”. There data to not support this claim. They  
341 convincingly show that overexpression of GYS2 partially restores glycogen levels, but they do not  
342 see a reversal.

343 **Response:** We have changed words to “reconstitution of GYS2 partially reversed  
344 Mettl3-cKO-associated glycogen deficiency” in line 275 in revised manuscript.

345

346 12. The authors conclude in lines 192-293, “And loss of m6A modifications of Gys2 mRNA  
347 perish[?] its expression both in RNA and protein levels”. They do not have data to backup this  
348 claim. The reduction of Gys2 mRNA and protein levels could be an indirect result of removing all  
349 mRNA methylation in these cells.

350 **Response:** We have changed the words to “And loss of m6A modifications perishes Gys2 mRNA  
351 expression in a post transcription manner.” in line 229 in revised manuscript. This is a conclusion  
352 from the data above.

353

354 13. Title: M6A does not govern liver glycogenesis simply through one mRNA (Gys2). Since the  
355 authors report a partial rescue of glycogen accumulation upon overexpression to Gys2 there must  
356 be other factors involved in the accumulation of glycogen.

357 **Response:** Our study demonstrated that METTL3 promotes the glycogenesis in liver via  
358 stabilizing Gys2 mRNA. However, we could not completely exclude other factors that may also  
359 facilitate METTL3 associated glycogen storage, since liver contains various effectors to regulate  
360 glycogenesis. Life is complicated, and it usually have diverse mechanisms to regulate important  
361 phenotypes. For example, on core mechanism of m6a regulated macrophage activation, we found  
362 SPRED2 was target of METTL3 (Nat Commun 2021 03 02;12(1)), however, other team found  
363 IRAKM could be another key gene in this process (Sci Adv 2021 04;7(18)). In summary, we  
364 could get the conclusion that Gys2 plays essential role in METTL3 mediated glycogenesis in liver,  
365 although we could not completely exclude other factors in this pathway.

366

367 14. supplementary Fig. 1 (line 156) when it should be 1A?

368 **Response:** We have changed words to “supplementary Figure 1a” in line 165 in revised  
369 manuscript.  
370

371 15. supplementary Fig. 1b is never mentioned in the text.

372 **Response:** In the revised manuscript, “supplementary Figure 1b” is shown in line 170.

373

374 16. Line 162 states that AQP8 was “downregulated”. This implies a specific control mechanism  
375 which is not supported by the data. Reduced level would be sufficient language and not  
376 misleading.

377 **Response:** We have changed words to “...was reduced in Mettl3-cKO mice (supplementary Figure  
378 1e).” in line 176 in revised manuscript.

379

380 17. Fig. 4 It is not clear in which system the authors conducted these experiments. Kidney cells or  
381 mouse liver? Needs to be more explicit in the results and in the figure legend.

382 **Response:** In the former manuscript, we tested the Gys2 expression levels in different human  
383 hepatocellular carcinoma cell lines and HEK-293T. We found that HEK-293T cells have the  
384 highest protein level of Gys2 in all tested cells, so we just used this cell line to do a  
385 proof-of-concept study.

386 In this revised manuscript, in order to get rid of misleading, we used Hepa 1-6 to verify the  
387 conclusion we got in HEK-293T cells. Hepa 1-6 is a mouse hepatocellular carcinoma cell line, and  
388 has high level of Gys2.

389

390 18. Fig. 4D legend needs to be clearer. I am assuming the authors are using an antibody against  
391 IGF2BP2, but it is not in the legend or the results section. This assay also needs a positive and  
392 negative control. For example, probe for Fasn in the pulldown.

393 **Response:** Here, we supplemented figure legend in Figure 3c. In addition, we detected Fasn in  
394 IGF2BP2 RIP-qPCR assay, however, no significant difference was found between HET and cKO  
395 hepatocytes (supplementary Figure 4b). Perhaps, IGF2BP2 was not the m6A reader of Fasn  
396 mRNA in this context. So, Fasn could be a negative control in this assay. For positive control,  
397 according to literature, we fail to find the mRNA that is wrote by METTL3 and read by IGF2BP2  
398 on m6A in hepatocytes.

399

400 19. supplementary Fig. 2b-f. Authors should show the actual data points and not just the means.

401 **Response:** In the revised manuscript, we showed the actual data points in each histogram,  
402 including the figures the reviewer mentioned.

403

404 20. Fig 6c-e. The transcript levels are relative to what?

405 **Response:** The transcript levels were relative to  $\beta$ -actin. We revised the figure legends to state the  
406 reference in qPCR assay.

407

408 21. In section: Reconstitution of GYS2 rescues liver glycogenesis in Mettl3-cKO mice. I do not  
409 understand what "activation" of GYS2 means. As I understand it, the authors are overexpressing  
410 GYS2 mRNA. Activation makes me think of turning on the protein (for example, through  
411 phosphorylation) not just making more.

412 **Response:** We have changed the words here to "Reconstitution of GYS2 rescues liver  
413 glycogenesis in Mettl3-cKO mice." in the revised manuscript.

414

415 22. Elucidate/justify the reasoning for using a kidney derived cell line(HEK-293T) when studying  
416 the liver.

417 **Response:** As we mentioned in Question 17 above, in the revised manuscript, we used Hepa 1-6 to  
418 test our model. Hepa 1-6 is a mouse hepatocellular carcinoma cell line with high Gys2 expression  
419 level. In the first manuscript, we tested the Gys2 expression levels in different human  
420 hepatocellular carcinoma cell lines and HEK-293T. Surprisingly, we found HEK-293T had  
421 highest protein level of Gys2, so we just used this cell line to investigate the  
422 METTL3-IGF2BP2-GYS2 axis.

423

424 23. The introduction could be improved by contextualizing the function of Gys2 in the context of  
425 glycogen storage and glucose homeostasis, in particular since Gys2 is the gene that the paper  
426 investigates most fully.

427 **Response:** We have added this section in the revised manuscript (from Line 89 to 95, on Page 3).  
428 We also attached the words as following,

429 Gys2, located at 12p12.1 in human, is conserved in chimpanzee, rhesus monkey, dog, cow, mouse,  
430 rat, chicken, and zebrafish. The protein encoded by this gene is liver glycogen synthase (GS), a  
431 key enzyme in glycogenesis, and catalyzes the addition of  $\alpha$ -1,4-linked glucose to the growing  
432 glycogen chain. Mutations in this gene cause glycogen storage disease type 0 (GSD-0) in early  
433 childhood, with hypoglycemia and liver glycogen defect as symptoms<sup>1,7</sup>. However, little is  
434 known about regulation of Gys2 expression.

435

436 24. Useful discussion point would be why is there more GYS2 protein being made even though  
437 the m6A regulation is removed.

438 **Response:** I thought that in our manuscript, we only showed the obvious decreasing of GYS2  
439 protein in liver of Mettl3-cKO mice compared with HET mice (Figure 3g). Accordingly, we did  
440 not find the place as the reviewer mentioned.

441

442 25. The presentation of the figures for was adequate except for Figs. 3 and 4, though there is  
443 considerable sloppiness throughout with inconsistent sizing (figures and fonts) and alignment

444 issues. The presentation of figure 3 could be greatly improved. The fonts are unreadable for panels  
445 3a-d and panel 3f should show the actual data points not just the means. Likewise Fig. 4 should  
446 show the data points not just the mean/median.

447 **Response:** Following the suggestion of the reviewer, we revised all the figures in this manuscript.

448

449 26. The analytical approach is not sufficient. The authors test multiple hypotheses simultaneously  
450 in many figures so they need to correct their statistical analysis for type 1 error. The figure legends  
451 could also be improved by reporting the statistical tests used. There needs to be much more detail  
452 in the methods sections for all the analysis done, in particular for the miRIP-seq experiment.

453 **Response:** We reanalyzed all the data in correct statistics methods and showed detailed  
454 information in figure legends. For multiple hypotheses test, we used one-way ANOVA or  
455 two-way ANOVA in Prism (Version 6.02). In addition, we replenished the details in the methods,  
456 including the meRIP-seq experiment (lines 539-564 in the revised manuscript).

457

458

459 Reviewer #3 (Remarks to the Author):

460

461 This paper provides evidence that the N6-methyl modification of glycogen synthase mRNA plays  
462 an important role in regulating the expression of glycogen synthase and therefore the level of  
463 glycogen in the liver.

464 **Response:** We thank the reviewer for evaluating our paper carefully and giving us positive  
465 comments and valuable suggestions. We agree with the reviewer and conducted more experiments  
466 to make our conclusion more compelling now. We hope that the reviewers will be satisfied with  
467 the revised version of our manuscript.

468

469 1. The findings provide novel insight into the regulation of liver glycogen synthase and glycogen  
470 levels. The findings are therefore of major significance to the field.

471 **Response:** We thank the reviewer for giving us positive comments.

472

473 2. The most important point of the paper, i.e. that glycogen synthase mRNA is stabilized by m6A  
474 modification, is well documented.

475 **Response:** We thank the reviewer for giving us positive comments.

476

477 3-1. In contrast, the relationship between liver glycogen level and m6A modification, and the  
478 amount of glycogen synthase protein is not convincing. Liver glycogen levels were measured by a  
479 qualitative assay. A quantitative assay should have been used.

480 **Response:** Using a glycogen content assay kit (abcam ab169558), we did quantitative assay to test  
481 liver glycogen levels in every context we mentioned in this study (Figure 1c, Figure 2c, Figure 5c,  
482 Figure 6b, supplementary Figure 2e).

483

484 3-2. To conclude that liver glycogen levels correlate with m6A modification, more animals of  
485 different ages should have been used.

486 **Response:** The relationship between relative fold of m6A mRNA and hepatic glycogen content  
487 was analyzed among ten different age samples (five mice were 4-week-old, the other five ones

488 were 8-week-old). The results show that they had positive relation with  $R=0.9443$ ,  $P < 0.0001$   
489 (Figure 1d).

490

491 3-3. Suckling mice/rats are on a very high-fat diet (milk). Four-week-old mice are transitioning  
492 from a high-fat diet to a high carbohydrate diet. Five-week-old mice would have been more  
493 appropriate. The literature references on age versus liver glycogen levels were for different species  
494 and therefore not relevant. In a study with mice, Roesler and Khandelwal, *Diabetes* 1985; 34:  
495 395-402, did not find an increase in liver glycogen with age. The relationship between age and  
496 glycogen levels is not on solid ground.

497 **Response:** In our study, we are trying to explain the biological significance of different liver  
498 glycogen storage abilities between pups and adults. Indeed, we accurately found the liver  
499 glycogen level was very low in suckling (2-week-old) mice (Attached Figure 5). However, we did  
500 not use these data because 2-week-old is preweaning. Furthermore, P. FERRÉ et al found that  
501 stomach contents were almost from chow at day 25 after birth in rat (*Reprod. Nutr. Dévelop.* 26  
502 (1986) 619-631). And 5-week-old mice are too close to adult (6-8 weeks) ones, so it should be  
503 reasonable to choose 4-week-old mice here.

504 In the study you mentioned above (*Diabetes* 1985; 34: 395-402), the authors used  
505 C57BL/KsJ-db/+ mice as control. However, we used C57BL/6N wildtype mice in our study.  
506 There are a lot of studies (listed below) that demonstrated the differences between C57BL mouse  
507 sub strains, maybe the different results attributed to different background and genotypes of mice.

508 a. Michelle M Simon, Simon Greenaway, Jacqueline K White, Helmut Fuchs, Valérie  
509 Gailus-Durner, Sara Wells et al. A comparative phenotypic and genomic analysis of  
510 C57BL/6J and C57BL/6N mouse strains[J]. *Genome Biology* 2013, 14:R82.

511 b. Hull RL, Willard JR, Struck MD, Barrow BM, Brar GS, Andrikopoulos S, Zraika S. High fat  
512 feeding unmask variable insulin responses in male C57BL/6 mouse substrains[J]. *J*  
513 *Endocrinol* 2017, 233(1):53-64

514 c. Coleman, D.L. Obese and diabetes: Two mutant genes causing diabetes-obesity syndromes in  
515 mice. *Diabetologia* 14, 141–148 (1978). <https://doi.org/10.1007/BF00429772>

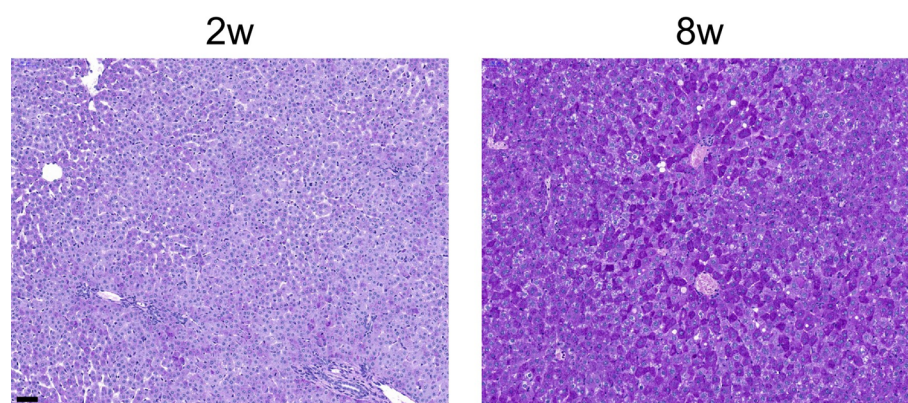

516

517 Attached Figure 5. PAS staining of rat livers in 2 weeks old (2w) and 8 weeks old (8w).

518

519 4. Whether m6A correlates with glycogen synthase protein amount is a critical issue. Rather than  
520 simply showing western blot analysis with for one sample from each group, experiments should  
521 have been run that allowed statistical analysis for this important point.

522 **Response:** Using CCLE (Cancer Cell Line Encyclopedia) data among more than one thousand cell  
523 lines, we analyzed the correlation between Gys2 mRNA and known key m6A machinery  
524 components, including Mettl3, Mettl14, Wtap, Alkbh5 and Fto. Strikingly, Mettl3, Mettl14 and  
525 Wtap, but not Alkbh5 or Fto, had positive correlation with Gys2 (Attached Figure 6, below).  
526 According to all data here, it can be concluded that the m6A level positively correlates with the  
527 expression of glycogen synthase 2.

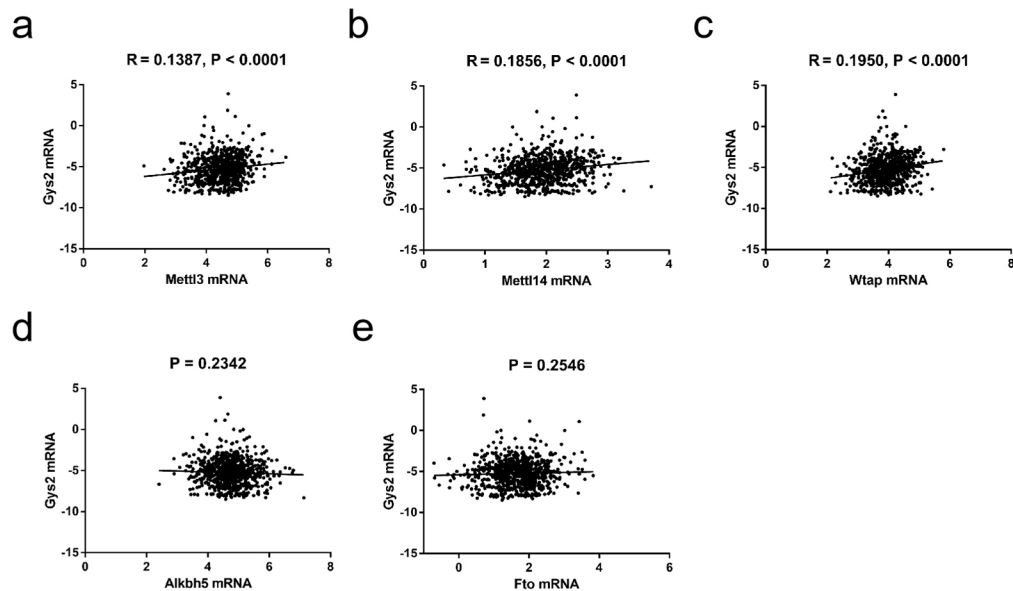

528

529 Attached Figure 6. CCLE data show mRNA relations between Gys2 and Mettl3 (a), Mettl14 (b),  
530 Wtap (c), Alkbh5 (d) and Fto (e).

531

532 5. Since glycogen synthase activity is subject to regulation by covalent modification, the paper  
533 would have been strengthened by measuring glycogen synthase activity with and without  
534 glucose-6-phosphate which completely activates the enzyme.

535 **Response:** Like many other enzymes in biochemistry, glycogen synthase 2 (Gys2) is regulated on  
536 several levels, including transcription activation, mRNA stability, post translation modification  
537 and allosteric activation. In this study, we found a METTL3-IGF2BP2-GYS2 axis that controls  
538 glycogen storage among pups and adults. Actually, it is an adaption regulation during for a long  
539 time. However, allosteric activation of Gys2 protein by glucose-6-phosphate usually happens  
540 within minutes, even seconds. So, we mainly focus on the regulation levels happened during a  
541 longer time. Here, we found that Gys2 mRNA was very low without m6A modification, both in  
542 condition of Mettl3 knockout (Figure 3f) and Gys2 mRNA mutation (Figure 4e). Furthermore, the  
543 protein of Gys2 was extremely low (less than 20%) than control group (Figure 3g and Figure 4f).  
544 Thus, we supposed that the m6A modification might be the key regulative step of Gys2 expression,  
545 although we could not completely exclude transcription of nascent RNA and modification of  
546 protein are other important regulation steps.

547

548 6. More information should have been provide about the time that blood samples were taken from  
549 the mice.

550 **Response:** The mice and rats in this study were housed on a 12 hours light-dark cycle (zeitgeber  
551 time[ZT]0-ZT24). Blood samples were taken during ZT9-11.



552

553 7. The authors assume that blood glucose levels are reduced by m6A deficiency because liver  
 554 glycogen levels are reduced. However, this was measured in the fed state. Since glycogen  
 555 synthase plays an important role in lowering blood glucose levels, it seems that the absence of  
 556 glycogen synthase should increase rather than decrease blood glucose. In other words, maybe  
 557 liver glycogen levels are reduced because blood glucose levels are reduced for some other reason.  
 558 Since m6A clearly regulates many enzymes, it seems likely that the situation is not as simple as  
 559 presented by the authors. Most likely enzymes of gluconeogenesis are affected by the status of  
 560 m6A. Likewise, enzymes that utilize gluconeogenic substrates, such as pyruvate dehydrogenase,  
 561 may be affected by the status of m6A. Since these factors regulate blood glucose levels, the  
 562 situation may be more complicated than presented by the authors.

563 **Response:**

564 Section A. On low Gys2 level and low blood glucose

565 Indeed, in the fed state, glycogen synthase plays an important role in lowering blood glucose  
 566 levels. However, like human beings, mice and rats are not always eating whole day, otherwise  
 567 they do not need to store liver glycogen. Needless glucose could all transformed to lipid or other  
 568 molecules. What's more, Jose M. Irimia et al tested blood glucose levels of LGSKO (liver  
 569 glycogen synthase knock-out) and control mice. In fed, 6-hour fast and overnight fast, the blood  
 570 glucose levels in LGSKO mice were all lower than controls (Table 2 of J Biol Chem 2010 Apr  
 571 23;285(17), below). Finally, in human beings, mutation or inactivation of Gys2 (glycogen  
 572 synthase 2, liver glycogen synthase) caused Glycogen Storage Disease 0 (GSD 0) in children. Low  
 573 blood glucose and low glycogen storage in liver are two main symptoms of this disease. In  
 574 conclusion, low Gys2 level and low blood glucose level are not contradictory in our study.

**TABLE 2**

**Blood parameters of CN and LGSKO mice under different feeding conditions**

All of the results are from 4-month-old males or from 7-month-old mice for the leptin, adiponectin, and resistin hormone levels.  $\beta$ -Hydroxybutyrate levels were measured as total ketone bodies. The numbers in parentheses indicate the *n* values for the given groups. The results are expressed as the means  $\pm$  S.E. ND, not determined.

|                                | Conditional          |                                 |                                     | LGSKO                            |                                     |                                     |
|--------------------------------|----------------------|---------------------------------|-------------------------------------|----------------------------------|-------------------------------------|-------------------------------------|
|                                | Fed                  | 6-h fast                        | Overnight fast                      | Fed                              | 6-h fast                            | Overnight fast                      |
| Glucose (mg/dl)                | 123.6 $\pm$ 4.5 (8)  | 134.5 $\pm$ 10.7 (8)            | 93.2 $\pm$ 6.1 (8) <sup>a,b</sup>   | 92.0 $\pm$ 4.5 (8) <sup>c</sup>  | 70.6 $\pm$ 5.0 (8) <sup>a,c</sup>   | 74.2 $\pm$ 5.8 (8) <sup>a,c</sup>   |
| Lactate (mM)                   | 2.83 $\pm$ 0.31 (7)  | 3.16 $\pm$ 0.17 (5)             | 2.04 $\pm$ 0.20 (5) <sup>b</sup>    | 2.42 $\pm$ 0.22 (12)             | 2.50 $\pm$ 0.13 (5)                 | 2.54 $\pm$ 0.36 (5)                 |
| Ketone bodies (mg/dl)          | 5.77 $\pm$ 0.48 (15) | 4.53 $\pm$ 0.76 (6)             | 17.9 $\pm$ 1.6 (13) <sup>a</sup>    | 6.84 $\pm$ 0.46 (14)             | 7.43 $\pm$ 0.94 (7)                 | 24.4 $\pm$ 1.6 (14) <sup>a,c</sup>  |
| Glycerol (mg/dl)               | 4.76 $\pm$ 0.47 (8)  | 5.18 $\pm$ 0.80 (5)             | 7.53 $\pm$ 0.58 (5) <sup>a,b</sup>  | 5.70 $\pm$ 0.39 (10)             | 7.31 $\pm$ 0.61 (5) <sup>a,c</sup>  | 7.78 $\pm$ 0.39 (5) <sup>a</sup>    |
| Nonesterified fatty acids (mM) | 0.86 $\pm$ 0.08 (7)  | 1.02 $\pm$ 0.09 (10)            | 1.86 $\pm$ 0.06 (11) <sup>a,b</sup> | 1.04 $\pm$ 0.07 (12)             | 1.60 $\pm$ 0.14 (13) <sup>a,c</sup> | 1.82 $\pm$ 0.10 (17) <sup>a</sup>   |
| Triglycerides (mg/dl)          | 75.0 $\pm$ 11.9 (8)  | 22.0 $\pm$ 4.2 (5) <sup>a</sup> | 94.9 $\pm$ 17.4 (5) <sup>b</sup>    | 65.3 $\pm$ 4.5 (10)              | 36.5 $\pm$ 7.3 (5) <sup>a</sup>     | 106.3 $\pm$ 24.3 (5) <sup>a,b</sup> |
| Insulin (ng/ml)                | 1.59 $\pm$ 0.29 (6)  | ND                              | 0.56 $\pm$ 0.18 (8) <sup>a</sup>    | 0.73 $\pm$ 0.15 (7) <sup>c</sup> | ND                                  | 0.21 $\pm$ 0.04 (8) <sup>a</sup>    |
| Glucagon (pg/ml)               | 97.4 $\pm$ 6.0 (8)   | ND                              | 77.6 $\pm$ 10.8 (8)                 | 102.2 $\pm$ 8.4 (10)             | ND                                  | 76.0 $\pm$ 10.3 (8)                 |
| Leptin (ng/ml)                 | ND                   | ND                              | 7.34 $\pm$ 3.71 (8)                 | ND                               | ND                                  | 7.77 $\pm$ 3.26 (8)                 |
| Adiponectin ( $\mu$ g/ml)      | ND                   | ND                              | 18.1 $\pm$ 2.1 (8)                  | ND                               | ND                                  | 15.0 $\pm$ 2.1 (8)                  |
| Resistin (pg/ml)               | ND                   | ND                              | 677 $\pm$ 45 (8)                    | ND                               | ND                                  | 519 $\pm$ 32 (8)                    |

<sup>a</sup> *p* < 0.05 vs. fed conditions.

<sup>b</sup> *p* < 0.05 vs. 6-h fasted conditions.

<sup>c</sup> *p* < 0.05 vs. conditional mice.

575

576

577 Section B. On other enzyme with m6A modification in liver

578 As the reviewer mentioned above, m6A modification has a lot of target molecules in liver and  
 579 other tissues. So, the Mettl3-Igf2bp2-Gys2 axis must not be the only pathway to affect liver  
 580 glycogen storage in mouse. However, we conjointly analyzed a meRIP-seq dataset from  
 581 hepatocytes and other three RNA-seq datasets from hepatocytes, male liver tissue and female liver  
 582 tissue, respectively. Under this stringent strategy, 26 candidate genes emerged, including Gys2,  
 583 Mlxipl, Egfr and Fasn. These four genes had known association with glycogen in liver in literature.  
 584 Mlxipl is a deleted gene in Williams-Beuren syndrome, however, glycogen storage defect and  
 585 hypoglycemia (two main phenotypes of Mettl3-cKO mice) are not symptoms of this syndrome.  
 586 According to IMPC (International Mouse Phenotyping Consortium), a famous mouse phenotype

587 website (<https://www.mousephenotype.org/>), glycogen storage defect and hypoglycemia are not  
588 phenotype of Egfr-KO mice. Fasn, a key enzyme in fatty acid synthesis, is thought to be less  
589 associated with glycogen synthesis, although glycometabolism and lipid metabolism are  
590 connected. Finally, we focused on Gys2 which is liver glycogen synthase and catalyzes the  
591 rate-limiting step in the synthesis of glycogen. As we mentioned in Section A above,  
592 loss-of-function mutation of Gys2 cause type 0 Glycogen Storage Disease (GSD) in children, who  
593 have glycogen storage defect and hypoglycemia as main symptoms. To sum up, the  
594 Mettl3-Igf2bp2-Gys2 axis we demonstrated here should be the key pathway affecting glycogen  
595 storage in liver, although it may not be the only one.



## **REVIEWERS' COMMENTS**

Reviewer #1 (Remarks to the Author):

The authors have responded to reviewer critiques appropriately.

Reviewer #3 (Remarks to the Author):

The revised manuscript has dealt with my concerns. I find the revised manuscript acceptable for publication.

1 Dear editor,

2 Here is our revised manuscript NCOMMS-21-47107B with a point-to-point response to the  
3 reviewers' comments.

4

5 Reviewers' comments:

6 Reviewer #1 (Remarks to the Author):

7 The authors have responded to reviewer critiques appropriately.

8 [Response:](#) We appreciate the Reviewer's positive comments on our efforts. Many thanks for the  
9 Reviewer's careful evaluation of our work.

10

11

12 Reviewer #3 (Remarks to the Author):

13 The revised manuscript has dealt with my concerns. I find the revised manuscript acceptable for  
14 publication.

15 [Response:](#) We appreciate the Reviewer's positive comments on our efforts. Many thanks for the  
16 Reviewer's careful evaluation of our work.
